# Supplementary material
Source: PubMed Central journal article supplement (PMC9308748)
Supplement: NIHMS1816205-supplement-1816205_Sup_Info.pdf [file NIHMS1816205-supplement-1816205_Sup_Info.pdf]

# Supplementary Information

**Title: A receptor-channel trio conducts Ca<sup>2+</sup> signaling for pollen tube reception**

Qifei Gao<sup>1</sup>, Chao Wang<sup>1</sup>, Yasheng Xi<sup>1</sup>, Qiaolin Shao<sup>1</sup>, Legong Li<sup>2</sup>, and Sheng Luan<sup>1\*</sup>

<sup>1</sup>Department of Plant and Microbial Biology, University of California at Berkeley; Berkeley, CA, 94720, USA

<sup>2</sup>College of Life Sciences, Capital Normal University; Beijing, 100048, China

\*Corresponding author. Email: sluan@berkeley.edu

## Supplementary information

### Supplementary Fig. 1.

Uncropped images for Fig 1a (a), 1b (b), 1c (c) and 2c (d).

### Supplementary Video 1.

Under control conditions, [Ca<sup>2+</sup>]<sub>cyt</sub> in Col-0 synergids remains low and steady. Scale bar is 20μm.

### Supplementary Video 2.

Application of 500 nM RALF4 elicits [Ca<sup>2+</sup>]<sub>cyt</sub> changes in Col-0 synergids.

### Supplementary Video 3.

Application of 500 nM RALF34 fails to elicit a [Ca<sup>2+</sup>]<sub>cyt</sub> change in Col-0 synergids.

### Supplementary Video 4.

Pollen tube induced [Ca<sup>2+</sup>]<sub>cyt</sub> change in Col-0 synergids. Pollen tubes were labeled by RFP.

### Supplementary Video 5.

[Ca<sup>2+</sup>]<sub>cyt</sub> in *fer-4* synergids fails to respond to 500 nM RALF4.

### Supplementary Video 6.

[Ca<sup>2+</sup>]<sub>cyt</sub> in *lre-5* synergids fails to respond to 500 nM RALF4.

22 **Supplementary Video 7.**

23  $[Ca^{2+}]_{cyt}$  in *nta-3* synergids fails to respond to 500 nM RALF4.

24 **Supplementary Video 8.**

25 10 mM external  $CaCl_2$  fails to trigger  $[Ca^{2+}]_{cyt}$  elevation in mock HEK293T cells.

26 **Supplementary Video 9.**

27 10 mM external  $CaCl_2$  fails to trigger  $[Ca^{2+}]_{cyt}$  elevation in HEK293T cells expressing NTA alone.

28 **Supplementary Video 10.**

29 10 mM external  $CaCl_2$  triggers a strong  $[Ca^{2+}]_{cyt}$  elevation in HEK293T cells expressing FER-LRE-NTA.

30

31 **Supplementary Fig. 1.** Uncropped images for Fig. 1a, 1b, 1c and 2c

32 **Supplementary Fig. 1a.** Uncropped images for Fig. 1a

33

**Fig. 1a**

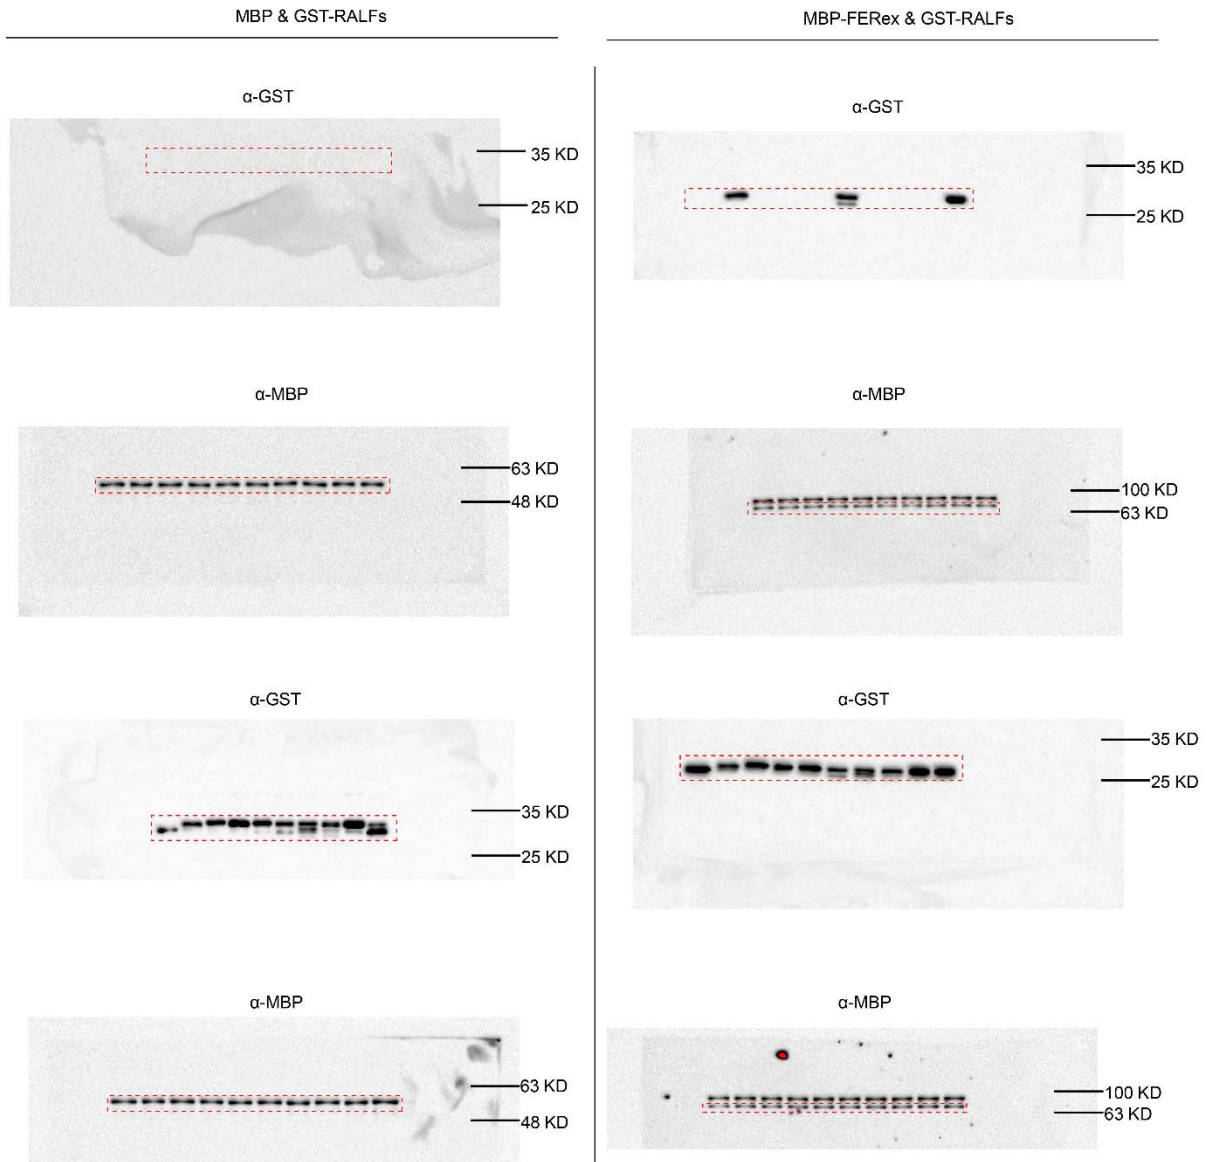

34

35

36 **Supplementary Fig. 1b.** Uncropped images for Fig. 1b

37

38

**Fig. 1b**

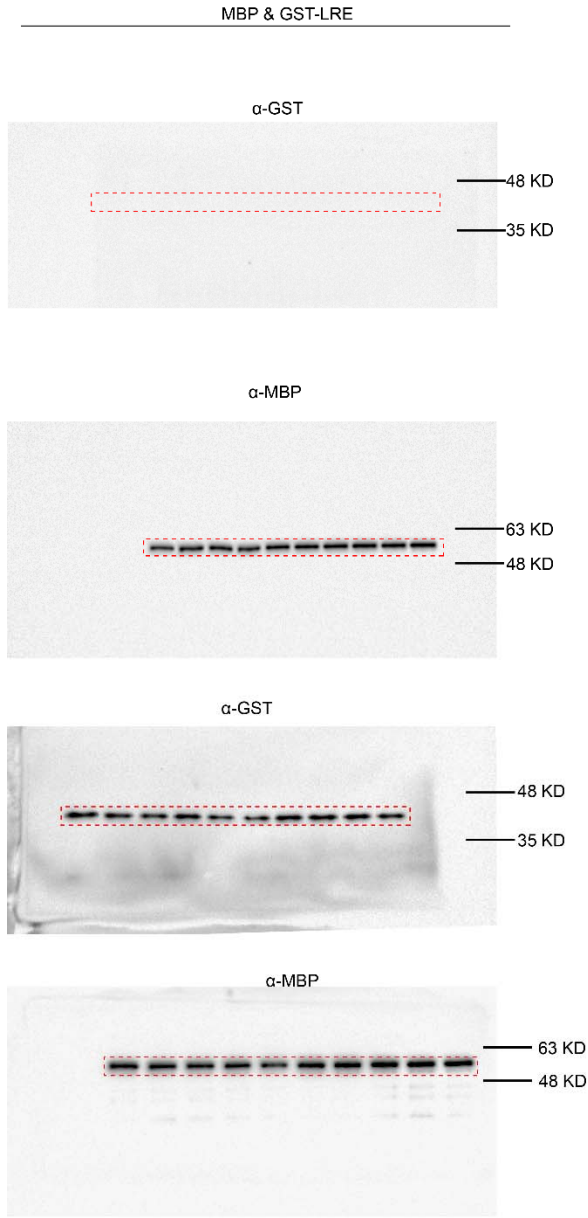

39

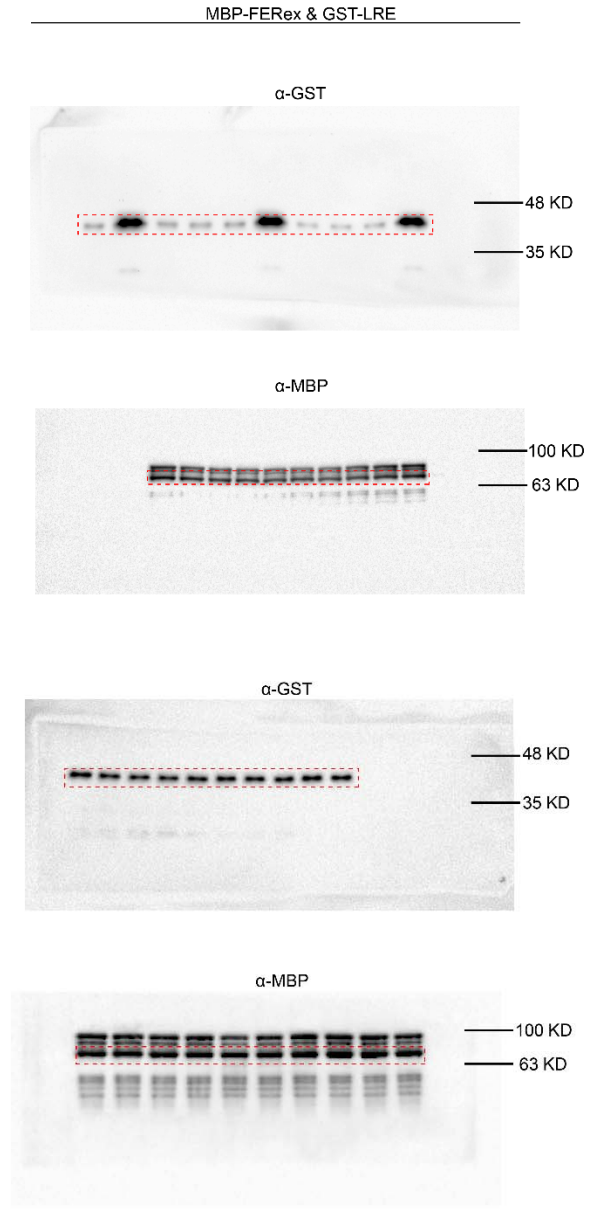

40 **Supplementary Fig. 1c.** Uncropped images for Fig. 1c

41

42

**Fig. 1c**

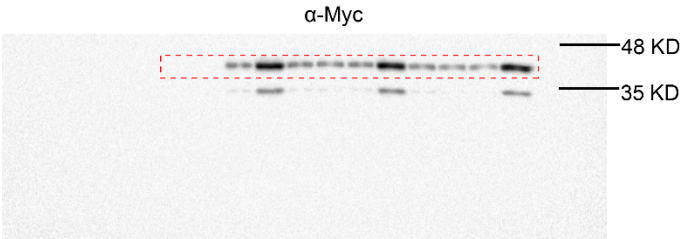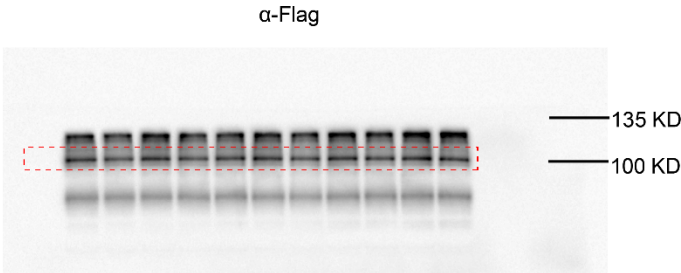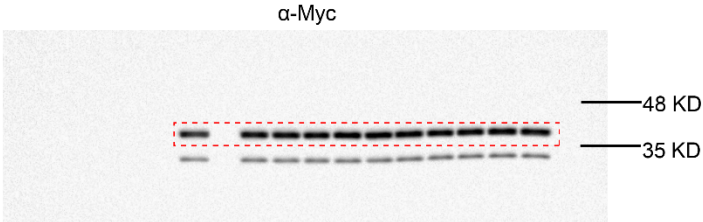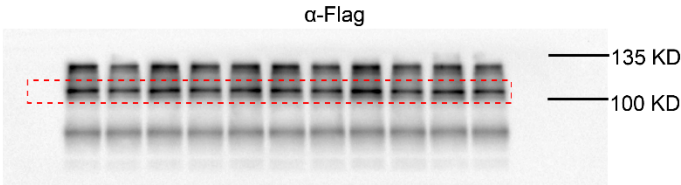

43

44

45

46

47 **Supplementary Fig. 1d.** Uncropped images for Fig. 2c

48

49

**Fig. 2c**

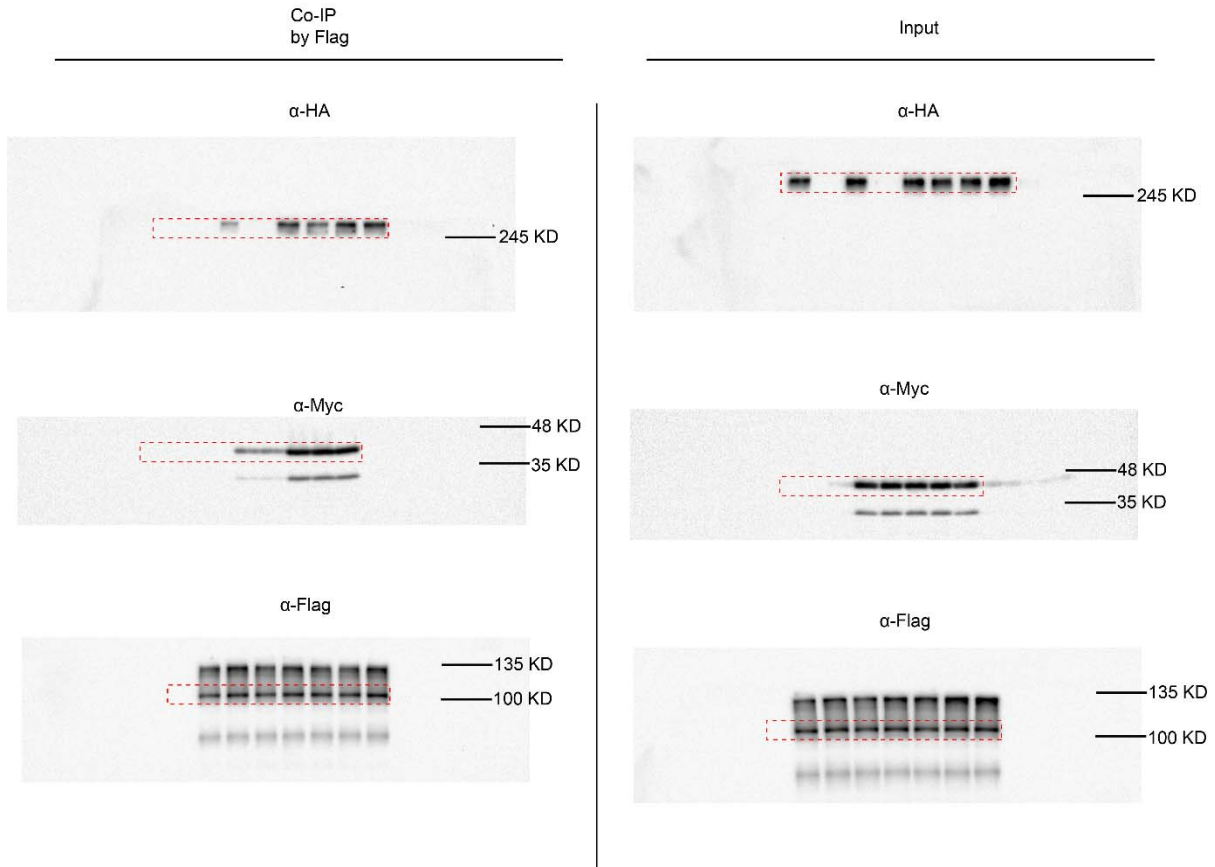

50
